# Supplementary material for: Probing the Surface of Human Carbonic Anhydrase for Clues towards the Design of Isoform Specific Inhibitors
Source: Hindawi journal article supplement (doi:10.1155/2015/453543), 2015-01-01
Supplement: f1 [file 453543.f1.pdf]

## Supplementary Materials

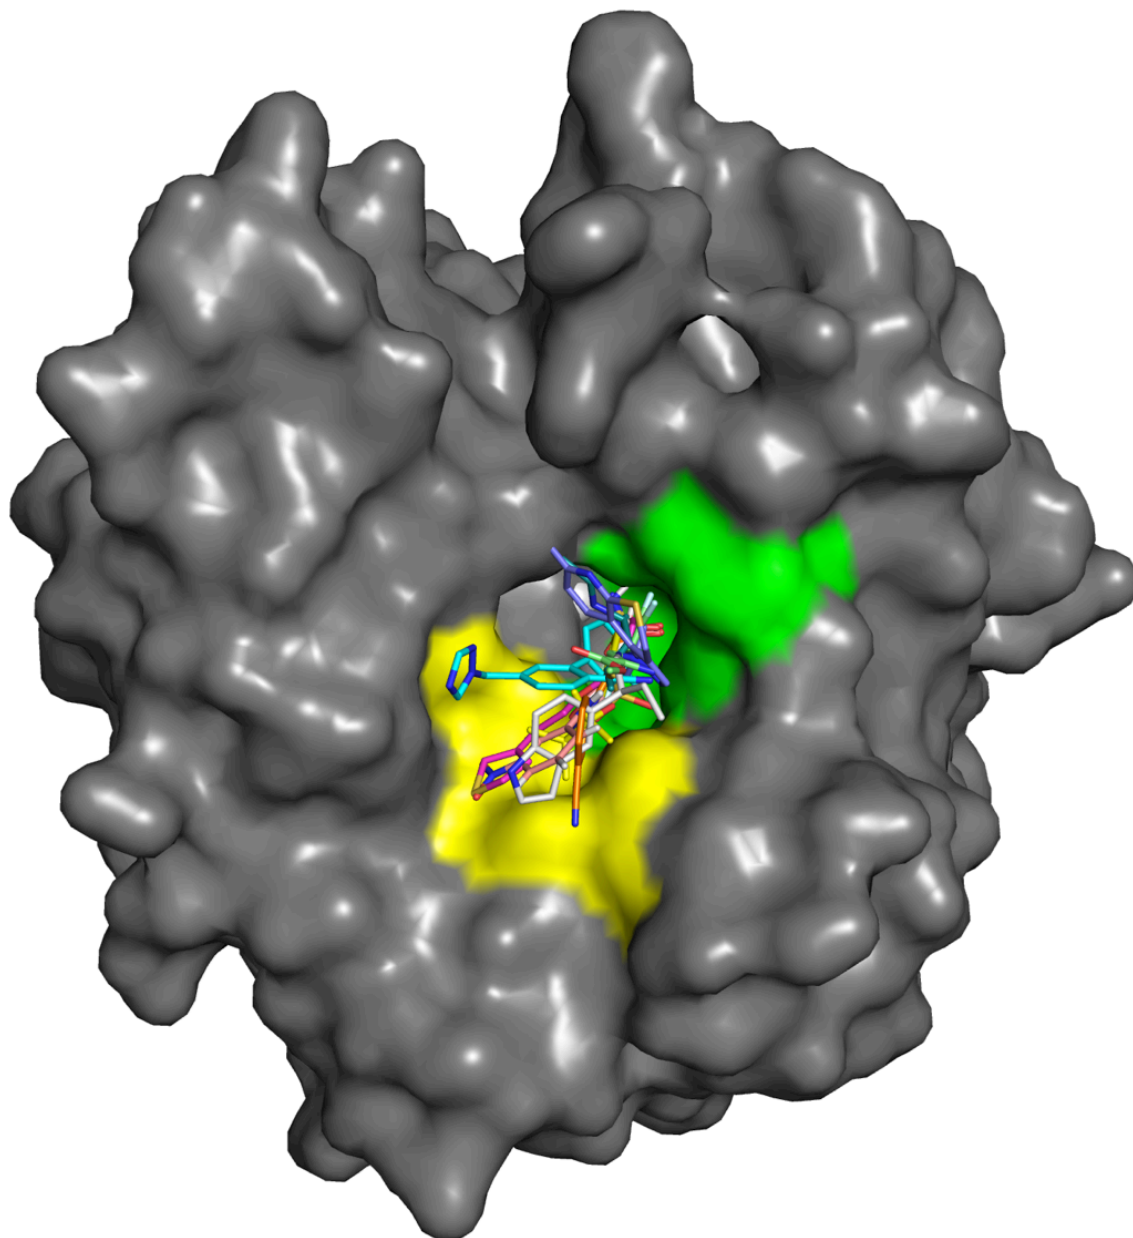

Binding of various inhibitors in the “conserved region” (green) or “selective pocket” (yellow) of the carbonic anhydrase II active site.
